# Supplementary material for: Characteristics of a resonant iris microwave-induced nitrogen plasma
Source: Royal Society of Chemistry journal article supplement (doi:10.1039/c6ja00066e), 2016-01-01
Supplement: c6ja00066e1.pdf [file c6ja00066e1.pdf]

## Supplementary Material

**Fig. S1.** Representation of the microwave radiation source **(a)** and the electric (large arrows) and magnetic (small arrows) fields generated by the magnetron **(b)**. Reproduced with permission. © 2016 Agilent Technologies, Inc. Courtesy of Agilent Technologies, Inc.

**Fig. S2.** General overview of the 4200 MP-AES optical system **(a)** and pre-optics assembly **(b)**. EW = entrance window, M1 = small toric mirror, FW = filter wheel assembly, M2 = large toric mirror, M3 = stepper motor positioned flat mirror, and ES = exit slit. Reproduced with permission. © 2016 Agilent Technologies, Inc. Courtesy of Agilent Technologies, Inc.

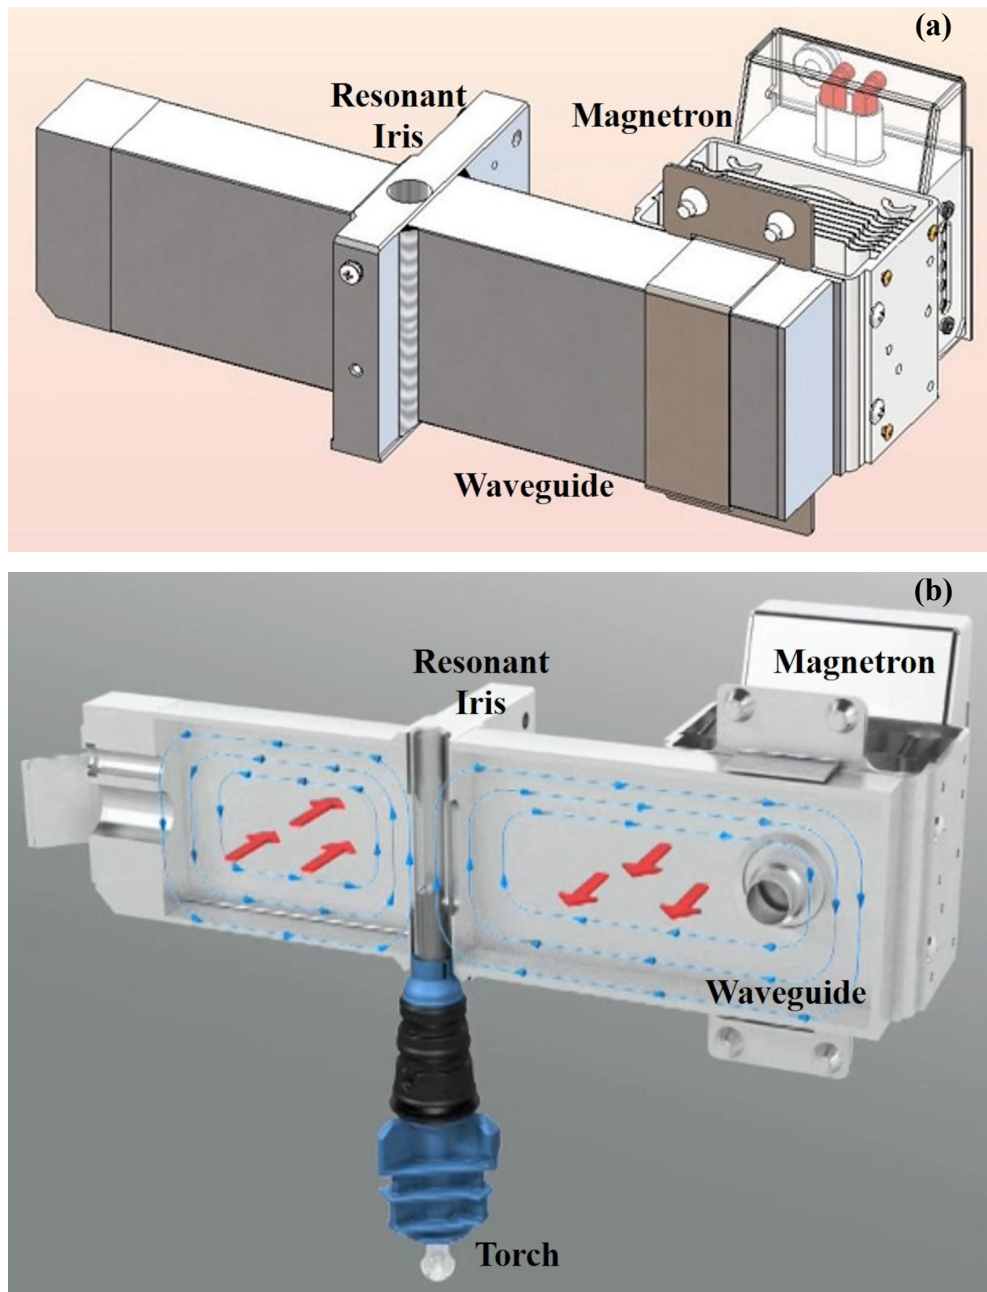

Fig. S1

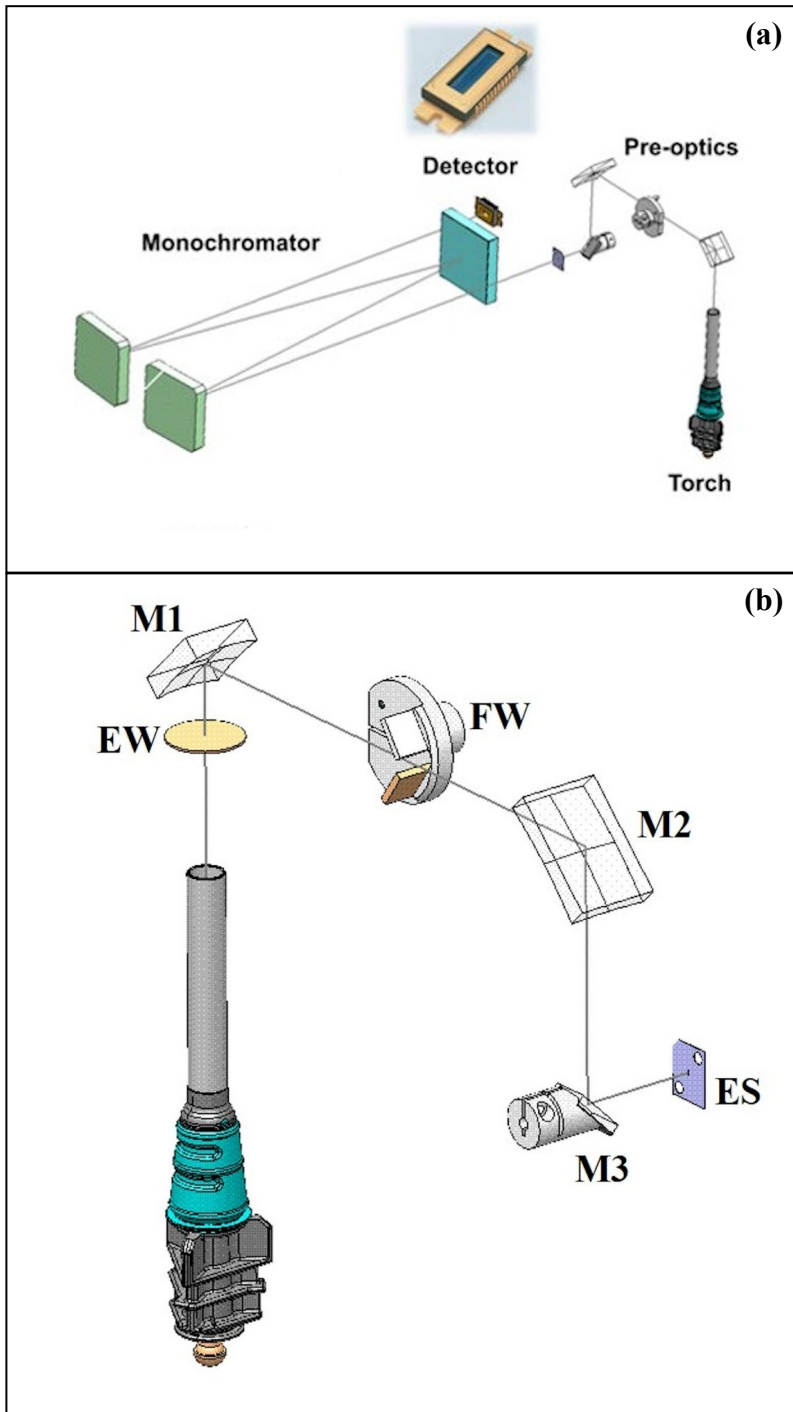

Fig. S2
